# Supplementary material for: Co-delivery of VEGF and bFGF via a PLGA nanoparticle-modified BAM for effective contracture inhibition of regenerated bladder tissue in rabbits
Source: PubMed Central journal article supplement (PMC4745101; doi:10.1038/srep20784), 2016-02-08
Supplement: srep20784-s1.pdf [file srep20784-s1.pdf]

## Supplementary Information

### **Co-delivery of VEGF and bFGF via a PLGA nanoparticle-modified BAM for effective contracture inhibition of regenerated bladder tissue in rabbits**

Xincheng Jiang <sup>1, †</sup>, Houwei Lin <sup>1, †</sup>, Dapeng Jiang <sup>1</sup>, Guofeng Xu <sup>1</sup>, Xiaoliang Fang <sup>1</sup>,  
Lei He <sup>1</sup>, Maosheng Xu <sup>1</sup>, Bingqiang Tang <sup>1</sup>, Zhiyong Wang <sup>2</sup>,  
Daxiang Cui <sup>3</sup>, Fang Chen <sup>4</sup>, Hongquan Geng <sup>1, \*</sup>

<sup>1</sup> Department of Pediatric Urology, Xinhua Hospital, Shanghai Jiao Tong University School of Medicine, Shanghai, China

<sup>2</sup> Shanghai Institute of Pharmaceutical Industry, Shanghai, China

<sup>3</sup> Key Laboratory for Thin Film and Microfabrication of Ministry of Education, Department of Bio-Nano Science and Engineering, Institute of Micro-Nano Science and Technology, Shanghai Jiao Tong University, Shanghai, China

<sup>4</sup> Department of Urology, Children's Hospital affiliated with Shanghai Jiao Tong University School of Medicine, Shanghai, China

\* Corresponding author. Department of Pediatric Urology, Xinhua Hospital, Shanghai Jiao Tong University School of Medicine, 1665 Kongjiang Road, Shanghai, 200092, China.

E-mail address: ghongquan@hotmail.com (H. Geng)

† These authors contributed equally to this work.

## Supplementary Figure S1

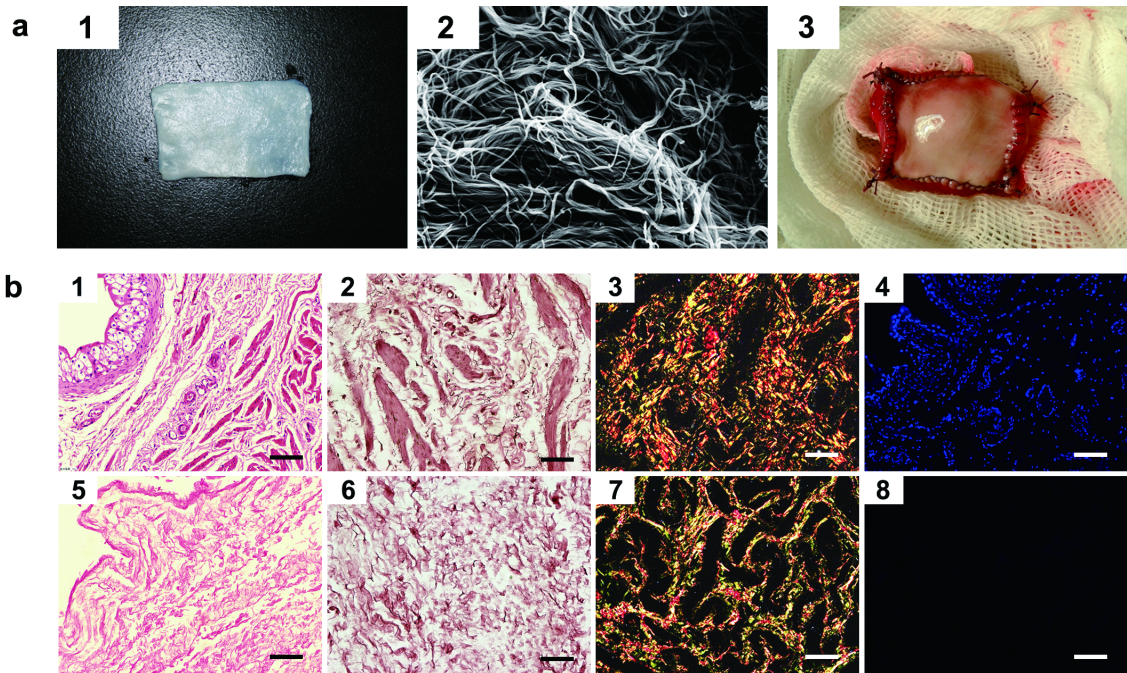

**The appearance of the porcine BAM.** In graph (a), 1 is a photograph of BAM, 2 is an SEM image of BAM, and 3 depicts rabbit bladder augmentation cystoplasty with the matrix groups. In graph (b), 1 and 5 show H&E staining of the native bladder tissue and BAM (scale bars = 100  $\mu$ m), 2 and 6 show orcein staining of the native bladder tissue and BAM (scale bars = 50  $\mu$ m), 3 and 7 show picric acid-Sirius red staining of the native bladder tissue and BAM (scale bars = 100  $\mu$ m), and 4 and 8 show DAPI staining of the native bladder tissue and BAM (scale bars = 200  $\mu$ m).

## Supplementary Figure S2

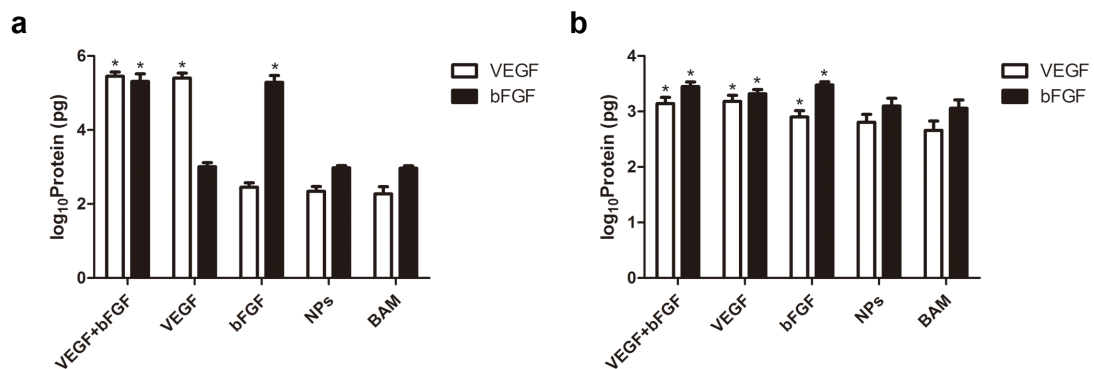

**The *in vivo* release of VEGF and bFGF in the BAM.** (a) The amounts of VEGF and bFGF released from the NPs at 4 weeks. (b) The amounts of VEGF and bFGF released from the NPs at 12 weeks. The data are expressed as the mean  $\pm$  SD, and the error bars represent the SD. (\*)  $p < 0.05$  compared with the BAM group.
